# Supplementary material for: The 2009 and 2021 CKD-EPI Equations: A Graphical Analysis of the Effect of Refitting GFR Estimating Equations Without a Race Coefficient
Source: PubMed Central journal article supplement — Kidney Med. 2022 Mar 11;4(5):100448. doi: 10.1016/j.xkme.2022.100448 (PMC9123604; doi:10.1016/j.xkme.2022.100448), 2022-03-11
Supplement: mmc1.pdf [file mmc1.pdf]

## Item S1. Formulas

# Formulas

## 2021 CKD-EPI

```
In[1]:= fcoefk[gender_] := If[gender == "female", 0.7, 0.9, ""]  
fcoefa1[gender_] := If[gender == "female", -0.241, -0.302, ""]  
fcoefd[gender_] := If[gender == "female", 1.012, 1, ""]  
fegfrcras[crea_, age_, gender_] :=  
142 * Min[crea / fcoefk[gender], 1]fcoefa1[gender] *  
Max[(crea / fcoefk[gender]), 1]-1.2 * 0.9938age * fcoefd[gender]
```

## Reverse 2009 CKD-EPI

```
f2kappa[gender_] := If[gender == "female", 0.7, 0.9, ""]  
f2alpha1[gender_] := If[gender == "female", -0.329, -0.411, ""]  
f2genderplus[gender_] := If[gender == "female", 144, 141, ""]  
f2race[race_] := If[race == "black", 1.159, 1, ""]
```

```
f2crea1[gfr_, age_, gender_, race_] :=  
f2kappa[gender]  $\left( \frac{0.993^{-age} \text{ gfr}}{f2genderplus[gender] \times f2race[race]} \right)^{\frac{1}{f2alpha1[gender]}}$ 
```

```
f2crea2[gfr_, age_, gender_, race_] :=  
f2kappa[gender]  $\left( \frac{0.993^{-age} \text{ gfr}}{f2genderplus[gender] \times f2race[race]} \right)^{\frac{1}{-1.209}}$ 
```

```
f2creafinal[gfr_, age_, gender_, race_] :=  
If[f2crea1[gfr, age, gender, race] < f2kappa[gender],  
f2crea1[gfr, age, gender, race], f2crea2[gfr, age, gender, race]]
```

---

## Formulas for absolute and relative differences

```
f2ad[gfr_, age_, gender_, race_] :=  
  fegfrcras[f2creafinal[gfr, age, gender, race], age, gender] - gfr  
f2rd[gfr_, age_, gender_, race_] :=  
  100 * (fegfrcras[f2creafinal[gfr, age, gender, race], age, gender] - gfr) / gfr
```

## Item S2. MDRD equation compared with the 2021 CKD-EPI refit

### MDRD

---

### Formulas

```
ln[ ]:= fmdrd[crea_, age_, gender_, race_] := 175 * crea-1.154 * age-0.203 *  
        If[gender == "female", 0.742, 1] * If[race == "black", 1.212, 1]  
fcreamdrd[gfr_, age_, gender_, race_] :=  
87.84299769292417` / (  $\frac{\text{age}^{0.203} \cdot \text{gfr}}{\text{If}[\text{gender} == \text{"female"}, 0.742, 1] \times \text{If}[\text{race} == \text{"black"}, 1.212, 1]}$  )  
fadmdrd[gfr_, age_, gender_, race_] :=  
fegfrcras[fcreamdrd[gfr, age, gender, race], age, gender] - gfr  
frdmdrd[gfr_, age_, gender_, race_] :=  
100 * (fegfrcras[fcreamdrd[gfr, age, gender, race], age, gender] - gfr) / gfr
```

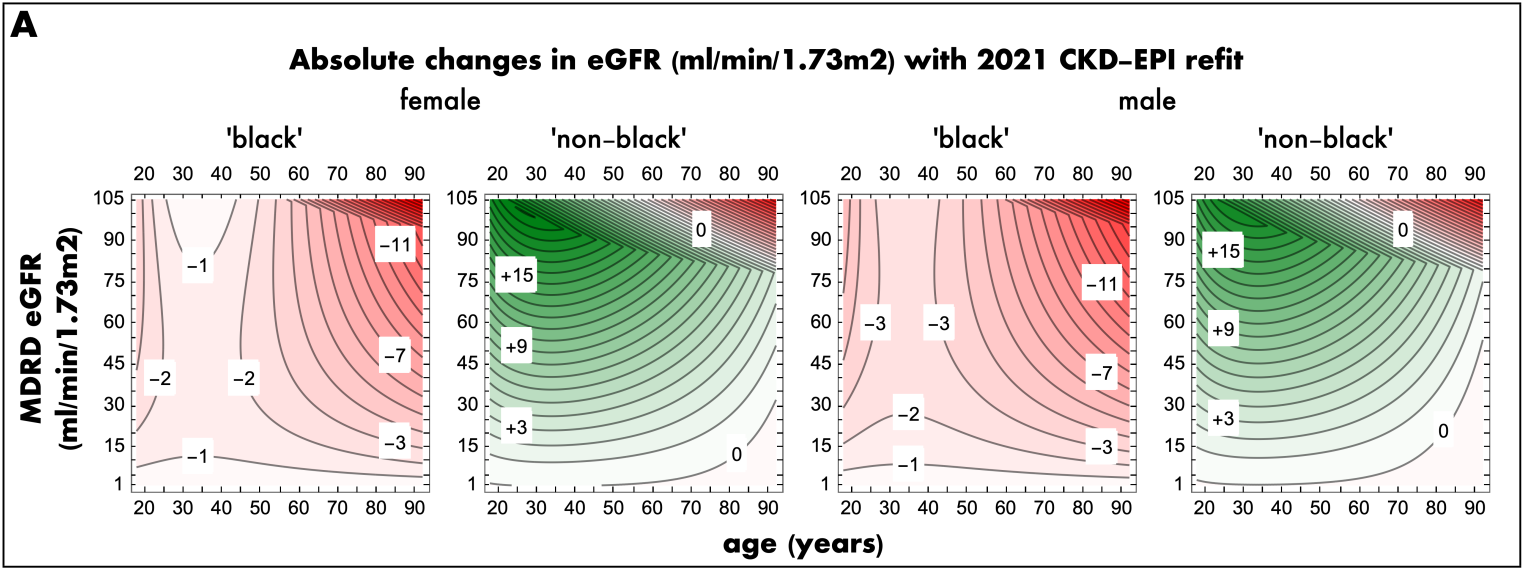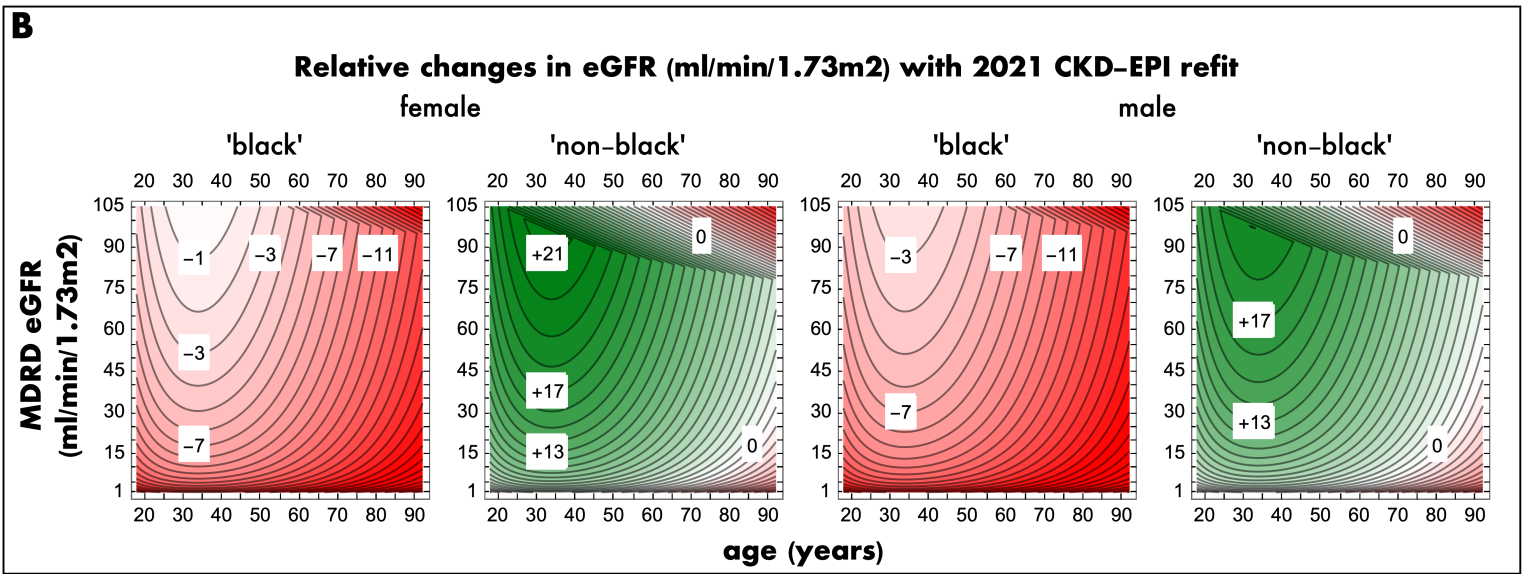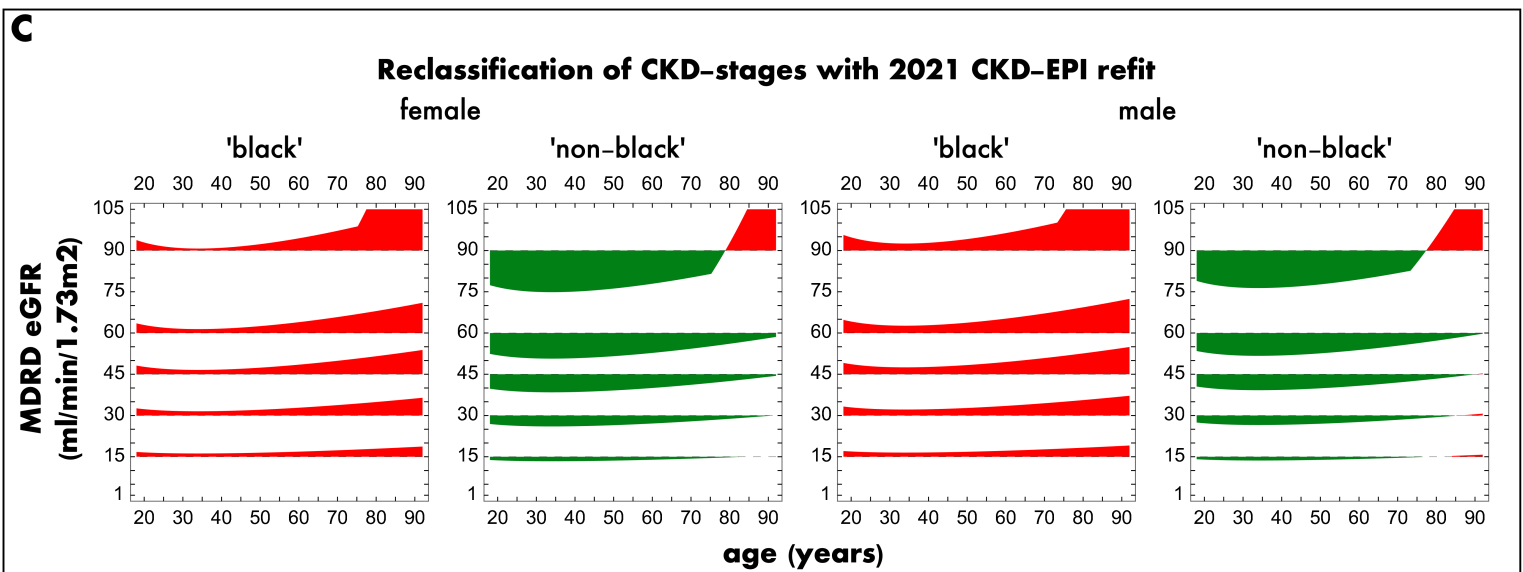

## **Figure legend**

Changes due to switching from the MDRD equation with a race coefficient to the 2021 CKD-EPI creatinine equation refit without the race variable as a function of age (x-axis, 18-92 years) and the MDRD eGFR values (y-axis, 1-105 ml/min/1.73m<sup>2</sup>).

A - Contour plots of absolute differences in eGFR (2021 CKD-EPI refit minus MDRD). Contours are drawn for every 1ml/min/1.73m<sup>2</sup> difference. Areas where 2021 CKD-EPI refit eGFR is lower than MDRD are shaded in red, where it is higher in green.

B - Contour plots of the relative differences in eGFR ( $100 \times (\text{2021 CKD-EPI refit minus MDRD}) / \text{MDRD}$ ). Contours are drawn for every 1% difference. Areas where 2021 CKD-EPI refit eGFR is lower than MDRD are shaded in red, where it is higher in green.

C - Region plots showing discordant CKD-stages. Areas where the CKD-stage according to 2021 CKD-EPI refit is higher than according to MDRD (i.e., eGFR is worse) are shaded in red, areas where CKD-stage is lower (i.e., eGFR is better) are shaded in green. In the white areas, CKD-stages are the same with both equations.
